# Supplementary material for: Comparison of Trends in Rates of Sexually Transmitted Infections Before vs After Initiation of HIV Preexposure Prophylaxis Among Men Who Have Sex With Men
Source: PubMed Central journal article supplement (PMC7758809; doi:10.1001/jamanetworkopen.2020.30806), 2020-12-23
Supplement: jamanetwopen-e2030806-s001.pdf [file jamanetwopen-e2030806-s001.pdf]

## Supplemental Online Content

McManus H, Grulich AE, Amin J, et al. Comparison of trends in rates of sexually transmitted infections before vs after initiation of HIV preexposure prophylaxis among men who have sex with men. *JAMA Netw Open*. 2020;3(12):e2030806.  
doi:10.1001/jamanetworkopen.2020.30806

**eTable 1.** Participant Testing Metrics by Stage of Follow-up

**eTable 2.** Before-After Average Positivity for Participants With No Record of Prior PrEP Use and  $\geq 2$  Tests in Year Prior to PrEP

**eTable 3.** Before-After Location Shift After Adjustment for Trend for Participants With No Record of Prior PrEP Use and  $\geq 2$  Tests in Year Prior to PrEP

**eTable 4.** Before-After Trend in Positivity for Participants With No Record of Prior PrEP Use and  $\geq 2$  Tests in Year Prior to PrEP Excluding Adjustment for Location Shift

**eTable 5.** Before-After Trend in Positivity and Location Shift for Participants With No Record of Prior PrEP Use and  $\geq 2$  Tests in Year Prior to PrEP Excluding Enrolment Window

**eTable 6.** Before-After Trend in Positivity and Location Shift for Participants With No Record of Prior PrEP Use and  $\geq 2$  Tests in Year Prior to PrEP and Adjusted for Time Period of Enrolment

This supplemental material has been provided by the authors to give readers additional information about their work.

**eTable 1. Participant Testing Metrics by Stage of Follow-up**

| Metric                                            | Before-after cohort <sup>a</sup> (prior to PrEP) | Before-after cohort <sup>a</sup> (1 year follow-up on PrEP) | p <sup>b</sup> | Before-after cohort <sup>a</sup> (2 years follow-up on PrEP) | p <sup>b</sup> |
|---------------------------------------------------|--------------------------------------------------|-------------------------------------------------------------|----------------|--------------------------------------------------------------|----------------|
| Number of positive results <sup>c</sup> , N (%)   |                                                  |                                                             |                |                                                              |                |
| 0                                                 | 1195 (50)                                        | 1172 (49)                                                   | 0.51           | 895 (37)                                                     | <0.001         |
| 1                                                 | 817 (34)                                         | 766 (32)                                                    | 0.12           | 687 (29)                                                     | <0.001         |
| 2                                                 | 310 (13)                                         | 339 (14)                                                    | 0.22           | 411 (17)                                                     | <0.001         |
| 3 or more                                         | 82 (3)                                           | 127 (5)                                                     | 0.00           | 411 (17)                                                     | <0.001         |
| Duration between tests <sup>d</sup> , mean (SD)   | 83.01 (64.11)                                    | 69.31 (42.37)                                               | <0.001         | 73.82 (52.28)                                                | <0.001         |
| Number of tests per year <sup>e</sup> , mean (SD) | 3.22 (1.44)                                      | 4.45 (1.85)                                                 | <0.001         | 3.57 (1.79)                                                  | <0.001         |

PrEP=Pre-exposure prophylaxis

a. EPIC participants with testing after enrolment and no record of prior PrEP and with 2 or more test in the year prior to enrolment; 587/30,549 (1.9%) tests did not have specified anatomical site. Includes 20 participants who did not have a test in first year of follow-up on PrEP; 1,209/2,404 (50%) tested were positive ever in year prior to PrEP, and 1,232/2,384 (52%) tested were positive ever in 1 year follow-up on PrEP.

b. T-test used for comparison of means with year prior to PrEP; chi-squared test used to compare count data with year prior to PrEP

c. limited to one positive test per quarter for any STI, denominator is number of individual participants with an STI test excluding baseline

d. Based on time between preceding and current test

e. Adjusted to annual rate based on complete quarters of follow-up prior to cohort censor date, excludes testing during window of enrolment

**eTable 2. Before-After Average Positivity for Participants With no Record of Prior PrEP Use and  $\geq 2$  Tests in Year Prior to PrEP<sup>a</sup>**

| Disease                      | Site of infection | Positivity (95% CI) |                     | RR (95% CI)      | p <sup>b</sup> |
|------------------------------|-------------------|---------------------|---------------------|------------------|----------------|
|                              |                   | Before PrEP         | PrEP                |                  |                |
| <b>Chlamydia</b>             | Anorectal         | 7.80 (7.18-8.42)    | 9.87 (9.32-10.43)   | 1.27 (1.15-1.40) | <0.001         |
|                              | Pharyngeal        | 1.27 (1.02-1.53)    | 1.30 (1.10-1.50)    | 1.02 (0.79-1.31) | 0.88           |
|                              | Urethral          | 3.19 (2.80-3.58)    | 4.02 (3.67-4.37)    | 1.26 (1.09-1.47) | 0.002          |
|                              | Any site          | 10.32 (9.63-11.01)  | 13.62 (12.98-14.25) | 1.32 (1.22-1.43) | <0.001         |
| <b>Gonorrhoea</b>            | Anorectal         | 4.28 (3.82-4.74)    | 5.54 (5.12-5.95)    | 1.29 (1.13-1.48) | <0.001         |
|                              | Pharyngeal        | 6.00 (5.46-6.55)    | 5.57 (5.16-5.99)    | 0.93 (0.83-1.04) | 0.22           |
|                              | Urethral          | 1.88 (1.58-2.18)    | 2.45 (2.17-2.72)    | 1.30 (1.07-1.58) | 0.008          |
|                              | Any site          | 11.11 (10.39-11.82) | 12.36 (11.75-12.97) | 1.11 (1.03-1.21) | 0.01           |
| <b>Chlamydia /Gonorrhoea</b> | Anorectal         | 11.21 (10.47-11.96) | 14.01 (13.34-14.67) | 1.25 (1.15-1.36) | <0.001         |
|                              | Pharyngeal        | 7.16 (6.56-7.76)    | 6.66 (6.20-7.12)    | 0.93 (0.84-1.04) | 0.19           |
|                              | Urethral          | 4.78 (4.31-5.26)    | 6.04 (5.61-6.47)    | 1.26 (1.12-1.43) | <0.001         |
|                              | Any site          | 19.51 (18.56-20.46) | 22.88 (22.06-23.71) | 1.17 (1.10-1.25) | <0.001         |
| <b>Syphilis</b>              |                   | 1.85 (1.43-2.26)    | 1.61 (1.29-1.94)    | 0.88 (0.65-1.18) | 0.39           |
| <b>Any</b>                   | Any site          | 20.00 (19.04-20.95) | 23.32 (22.49-24.15) | 1.17 (1.10-1.24) | <0.001         |

PrEP=Pre-exposure prophylaxis; RR=rate ratio; CI=confidence interval

- a. N=2,404. Positivity calculated using limit of 1 positive result and test per participant per quarter. Multivariate Poisson regression model adjusted for PrEP status, patient-level random effects.
- b. Wald test

**eTable 3. Before-After Location Shift After Adjustment for Trend for Participants With No Record of Prior PrEP Use and  $\geq 2$  Tests in Year Prior to PrEP<sup>a</sup>**

| Disease                     | Site of infection | RR intercept (95%CI) | P <sup>b</sup> |
|-----------------------------|-------------------|----------------------|----------------|
| <b>Chlamydia</b>            | Anorectal         | 1.09 (0.93-1.28)     | 0.30           |
|                             | Pharyngeal        | 0.78 (0.51-1.20)     | 0.26           |
|                             | Urethral          | 0.98 (0.77-1.26)     | 0.89           |
|                             | Any site          | 1.05 (0.93-1.20)     | 0.42           |
| <b>Gonorrhoea</b>           | Anorectal         | 1.21 (0.98-1.49)     | 0.08           |
|                             | Pharyngeal        | 1.05 (0.87-1.28)     | 0.61           |
|                             | Urethral          | 1.35 (0.99-1.85)     | 0.06           |
|                             | Any site          | 0.99 (0.87-1.12)     | 0.88           |
| <b>Chlamydia/Gonorrhoea</b> | Anorectal         | 1.09 (0.96-1.24)     | 0.19           |
|                             | Pharyngeal        | 1.00 (0.84-1.20)     | 0.98           |
|                             | Urethral          | 1.11 (0.91-1.34)     | 0.30           |
|                             | Any site          | 1.01 (0.92-1.10)     | 0.88           |
| <b>Syphilis</b>             |                   | 0.48 (0.28-0.82)     | 0.008          |
| <b>Any</b>                  | Any site          | 1.00 (0.92-1.09)     | 0.96           |

PrEP=Pre-exposure prophylaxis; RR=rate ratio; CI=confidence interval

- a. N=2,404. EPIC participants with testing after enrolment and no record of prior PrEP and with 2 or more test in the year prior to enrolment, 587/30,549 (1.9%) tests did not have specified anatomical site, including 263/12,733 (2.1%) before PrEP & 324/17,492 (1.8%) during PrEP, chi-squared test for difference  $p=0.121$ . Multivariable binomial-log regression adjusted for PrEP status and quarter of follow-up, patient-level random effects.
- b. Wald test

**eTable 4. Before-After Trend in Positivity for Participants With No Record of Prior PrEP Use and  $\geq 2$  Tests in Year Prior to PrEP Excluding Adjustment for Location Shift<sup>a</sup>**

| Disease                      | Site of infection | Before PrEP (change/quarter) (95% CI) | <i>P</i> <sup>b</sup> | After PrEP (change/quarter) (95% CI) | <i>P</i> <sup>b</sup> | RR trend <sup>1</sup> (95% CI) | <i>P</i> <sup>b</sup> |
|------------------------------|-------------------|---------------------------------------|-----------------------|--------------------------------------|-----------------------|--------------------------------|-----------------------|
| <b>Chlamydia</b>             | Anorectal         | 1.11 (1.06-1.16)                      | <0.001                | 1.01 (0.99-1.03)                     | 0.29                  | 0.91 (0.86-0.97)               | 0.002                 |
|                              | Pharyngeal        | 1.02 (0.91-1.15)                      | 0.74                  | 1.02 (0.96-1.07)                     | 0.57                  | 1.00 (0.86-1.16)               | 0.96                  |
|                              | Urethral          | 1.13 (1.05-1.22)                      | 0.001                 | 1.01 (0.98-1.04)                     | 0.53                  | 0.89 (0.81-0.98)               | 0.02                  |
|                              | Any site          | 1.12 (1.08-1.16)                      | <0.001                | 1.02 (1.00-1.03)                     | 0.017                 | 0.91 (0.87-0.96)               | <0.001                |
| <b>Gonorrhoea</b>            | Anorectal         | 1.10 (1.03-1.18)                      | 0.003                 | 1.01 (0.98-1.03)                     | 0.61                  | 0.91 (0.84-0.99)               | 0.03                  |
|                              | Pharyngeal        | 1.03 (0.98-1.09)                      | 0.25                  | 0.96 (0.94-0.99)                     | 0.004                 | 0.93 (0.87-1.00)               | 0.052                 |
|                              | Urethral          | 1.07 (0.98-1.17)                      | 0.12                  | 1.02 (0.98-1.06)                     | 0.29                  | 0.95 (0.85-1.06)               | 0.36                  |
|                              | Any site          | 1.07 (1.03-1.11)                      | <0.001                | 1.00 (0.99-1.02)                     | 0.86                  | 0.94 (0.89-0.98)               | 0.006                 |
| <b>Chlamydia /Gonorrhoea</b> | Anorectal         | 1.10 (1.06-1.14)                      | <0.001                | 1.01 (1.00-1.03)                     | 0.19                  | 0.92 (0.88-0.96)               | <0.001                |
|                              | Pharyngeal        | 1.03 (0.98-1.08)                      | 0.28                  | 0.97 (0.95-0.99)                     | 0.009                 | 0.94 (0.89-1.01)               | 0.07                  |
|                              | Urethral          | 1.11 (1.05-1.18)                      | <0.001                | 1.01 (0.99-1.03)                     | 0.45                  | 0.91 (0.85-0.98)               | 0.009                 |
|                              | Any site          | 1.08 (1.05-1.11)                      | <0.001                | 1.01 (1.00-1.02)                     | 0.2                   | 0.93 (0.90-0.96)               | <0.001                |
| <b>Syphilis</b>              |                   | 0.99 (0.86-1.13)                      | 0.84                  | 1.03 (0.96-1.11)                     | 0.36                  | 1.05 (0.87-1.26)               | 0.62                  |
| <b>Any</b>                   | Any site          | 1.08 (1.05-1.11)                      | <0.001                | 1.01 (1.00-1.02)                     | 0.21                  | 0.93 (0.90-0.96)               | <0.001                |

PrEP=Pre-exposure prophylaxis; RR=rate ratio; CI=confidence interval

- a. N=2,404. EPIC participants with testing after enrolment and no record of prior PrEP and with 2 or more test in the year prior to enrolment, 587/30,549 (1.9%) tests did not have specified anatomical site, including 263/12,733 (2.1%) before PrEP & 324/17,492 (1.8%) during PrEP, chi-squared test for difference  $p=0.121$ . Multivariate binomial-log regression adjusted for quarter of follow-up, patient-level random effects.
- b. Wald test

**eTable 5. Before-After Trend in Positivity and Location Shift for Participants With No Record of Prior PrEP Use and  $\geq 2$  Tests in Year Prior to PrEP Excluding Enrolment Window<sup>a</sup>**

| Disease                      | Site of infection | before enrolment change/quarter- (95%CI) | P <sup>b</sup> | after enrolment change/quarter- (95%CI) | p <sup>b</sup> | RR trend (95%CI) | p <sup>b</sup> | RR intercept (95%CI) | p <sup>b</sup> |
|------------------------------|-------------------|------------------------------------------|----------------|-----------------------------------------|----------------|------------------|----------------|----------------------|----------------|
| <b>Chlamydia</b>             | Anorectal         | 1.06 (0.97-1.15)                         | 0.19           | 1.00 (0.98-1.03)                        | 0.85           | 0.95 (0.87-1.03) | 0.22           | 1.19 (0.93-1.52)     | 0.17           |
|                              | Pharyngeal        | 1.05 (0.86-1.27)                         | 0.63           | 1.04 (0.97-1.12)                        | 0.25           | 0.99 (0.81-1.22) | 0.96           | 0.81 (0.45-1.49)     | 0.50           |
|                              | Urethral          | 1.14 (1.00-1.30)                         | 0.052          | 1.01 (0.97-1.05)                        | 0.59           | 0.89 (0.77-1.02) | 0.09           | 0.97 (0.67-1.39)     | 0.86           |
|                              | Any site          | 1.09 (1.01-1.16)                         | 0.02           | 1.01 (0.99-1.03)                        | 0.17           | 0.93 (0.87-1.01) | 0.07           | 1.12 (0.91-1.37)     | 0.28           |
| <b>Gonorrhoea</b>            | Anorectal         | 1.00 (0.89-1.12)                         | 0.97           | 0.99 (0.96-1.02)                        | 0.53           | 0.99 (0.88-1.12) | 0.89           | 1.46 (1.04-2.05)     | 0.03           |
|                              | Pharyngeal        | 0.97 (0.88-1.07)                         | 0.52           | 0.96 (0.93-0.99)                        | 0.009          | 0.99 (0.89-1.09) | 0.80           | 1.23 (0.92-1.65)     | 0.16           |
|                              | Urethral          | 0.97 (0.82-1.15)                         | 0.71           | 0.99 (0.95-1.04)                        | 0.67           | 1.02 (0.86-1.22) | 0.81           | 1.54 (0.94-2.53)     | 0.08           |
|                              | Any site          | 1.01 (0.95-1.08)                         | 0.68           | 1.00 (0.98-1.02)                        | 0.89           | 0.99 (0.92-1.06) | 0.72           | 1.16 (0.96-1.41)     | 0.14           |
| <b>Chlamydia /Gonorrhoea</b> | Anorectal         | 1.03 (0.96-1.11)                         | 0.36           | 1.00 (0.98-1.02)                        | 0.83           | 0.97 (0.90-1.04) | 0.41           | 1.24 (1.02-1.52)     | 0.03           |
|                              | Pharyngeal        | 0.98 (0.91-1.07)                         | 0.71           | 0.97 (0.94-1.00)                        | 0.04           | 0.98 (0.90-1.07) | 0.71           | 1.13 (0.88-1.46)     | 0.34           |
|                              | Urethral          | 1.07 (0.97-1.19)                         | 0.18           | 1.00 (0.97-1.03)                        | 0.92           | 0.93 (0.83-1.04) | 0.20           | 1.16 (0.86-1.56)     | 0.35           |
|                              | Any site          | 1.04 (0.99-1.09)                         | 0.09           | 1.01 (0.99-1.02)                        | 0.39           | 0.97 (0.92-1.01) | 0.16           | 1.12 (0.98-1.29)     | 0.11           |
| <b>Syphilis</b>              |                   | 1.05 (0.82-1.35)                         | 0.70           | 1.12 (1.02-1.23)                        | 0.01           | 1.07 (0.82-1.39) | 0.64           | 0.54 (0.25-1.17)     | 0.12           |
| <b>Any</b>                   | Any site          | 1.04 (0.99-1.09)                         | 0.10           | 1.01 (0.99-1.02)                        | 0.33           | 0.97 (0.92-1.02) | 0.19           | 1.12 (0.98-1.28)     | 0.10           |

PrEP=Pre-exposure prophylaxis; RR=rate ratio; CI=confidence interval

- a. N=2,404. Positivity calculated using limit of 1 positive result and test per participant per quarter, Multivariable binomial-log regression adjusted for PrEP status and quarter of follow-up, patient-level random effects. Baseline quarter excluded from model fit.
- b. Wald test

**eTable 6. Before-After Trend in Positivity and Location Shift for Participants With No Record of Prior PrEP Use and  $\geq 2$  Tests in Year Prior to PrEP and Adjusted for Time Period of Enrolment<sup>a</sup>**

| Disease                          | Site of infection | trend before enrolment change per quarter (95%CI) | p      | trend after enrolment change per quarter (95%CI) | p     | Risk ratio of trend (95%CI) | p      | Risk ratio of intercept (95%CI) | p     |
|----------------------------------|-------------------|---------------------------------------------------|--------|--------------------------------------------------|-------|-----------------------------|--------|---------------------------------|-------|
| <b>Chlamydia</b>                 | Anorectal         | 1.09 (1.03-1.16)                                  | 0.001  | 1.00 (0.97-1.02)                                 | 0.84  | 0.91 (0.86-0.97)            | 0.003  | 1.10 (0.94-1.29)                | 0.25  |
|                                  | Pharyngeal        | 1.06 (0.93-1.22)                                  | 0.38   | 1.04 (0.98-1.12)                                 | 0.22  | 0.98 (0.85-1.14)            | 0.826  | 0.78 (0.50-1.20)                | 0.25  |
|                                  | Urethral          | 1.13 (1.04-1.24)                                  | 0.004  | 1.01 (0.97-1.05)                                 | 0.70  | 0.89 (0.81-0.98)            | 0.014  | 0.99 (0.78-1.26)                | 0.94  |
|                                  | Any site          | 1.11 (1.06-1.16)                                  | <0.001 | 1.01 (0.99-1.03)                                 | 0.22  | 0.91 (0.87-0.96)            | <0.001 | 1.06 (0.93-1.21)                | 0.391 |
| <b>Gonorrhoea</b>                | Anorectal         | 1.07 (0.99-1.15)                                  | 0.10   | 0.98 (0.94-1.01)                                 | 0.19  | 0.92 (0.84-0.10)            | 0.045  | 1.23 (1.99-1.53)                | 0.05  |
|                                  | Pharyngeal        | 1.02 (0.96-1.09)                                  | 0.49   | 0.95 (0.92-0.98)                                 | 0.002 | 0.93 (0.86-1.00)            | 0.037  | 1.07 (0.88-1.30)                | 0.48  |
|                                  | Urethral          | 1.02 (0.91-1.13)                                  | 0.79   | 1.00 (0.95-1.04)                                 | 0.86  | 0.98 (0.87-1.10)            | 0.744  | 1.34 (0.98-1.84)                | 0.07  |
|                                  | Any site          | 1.07 (1.02-1.12)                                  | 0.002  | 1.00 (0.98-1.02)                                 | 0.96  | 0.93 (0.89-0.98)            | 0.005  | 0.99 (0.88-1.13)                | 0.94  |
| <b>Chlamydia/<br/>Gonorrhoea</b> | Anorectal         | 1.08 (1.03-1.13)                                  | 0.001  | 1.00 (0.98-1.02)                                 | 0.71  | 0.92 (0.88-0.97)            | 0.001  | 1.10 (0.97-1.25)                | 0.14  |
|                                  | Pharyngeal        | 1.03 (0.97-1.08)                                  | 0.39   | 0.96 (0.93-0.99)                                 | 0.01  | 0.94 (0.88-1.00)            | 0.048  | 1.02 (0.85-1.21)                | 0.85  |
|                                  | Urethral          | 1.09 (1.02-1.17)                                  | 0.01   | 1.00 (0.97-1.03)                                 | 0.95  | 0.92 (0.85-0.99)            | 0.019  | 1.11 (0.91-1.34)                | 0.30  |
|                                  | Any site          | 1.08 (1.05-1.12)                                  | <0.001 | 1.01 (0.99-1.02)                                 | 0.461 | 0.93 (0.90-0.96)            | <0.001 | 1.01 (0.93-1.10)                | 0.82  |
| <b>Syphilis</b>                  |                   | 1.10 (0.94-1.29)                                  | 0.25   | 1.11 (1.02-1.22)                                 | 0.02  | 1.01 (0.84-1.21)            | 0.905  | 0.48 (0.28-0.84)                | 0.009 |
| <b>Any</b>                       | Any site          | 1.08 (1.05-1.11)                                  | <0.001 | 1.01 (0.99-1.02)                                 | 0.40  | 0.93 (0.90-0.96)            | <0.001 | 1.00 (0.92-1.09)                | 0.98  |

PrEP=Pre-exposure prophylaxis; RR=rate ratio; CI=confidence interval

a. N=2,404. EPIC participants with testing after enrolment and no record of prior PrEP and with 2 or more test in the year prior to enrolment, 587/30,549 (1.9%) tests did not have specified anatomical site, including 263/12,733 (2.1%) before PrEP & 324/17,492 (1.8%) during PrEP, chi-squared test for difference p=0.121. Multivariable binomial-log regression adjusted for PrEP status, enrolment period [May-16 to June-16 (early), July-16 to December-16 (middle), January-17 to April-18 (late)] and quarter of follow-up, patient-level random effects.

b. Wald test
